# Supplementary material
Source: PubMed Central journal article supplement (PMC2689992)
Supplement: pp.109.138222_1.pdf [file pp.109.138222_1.pdf]

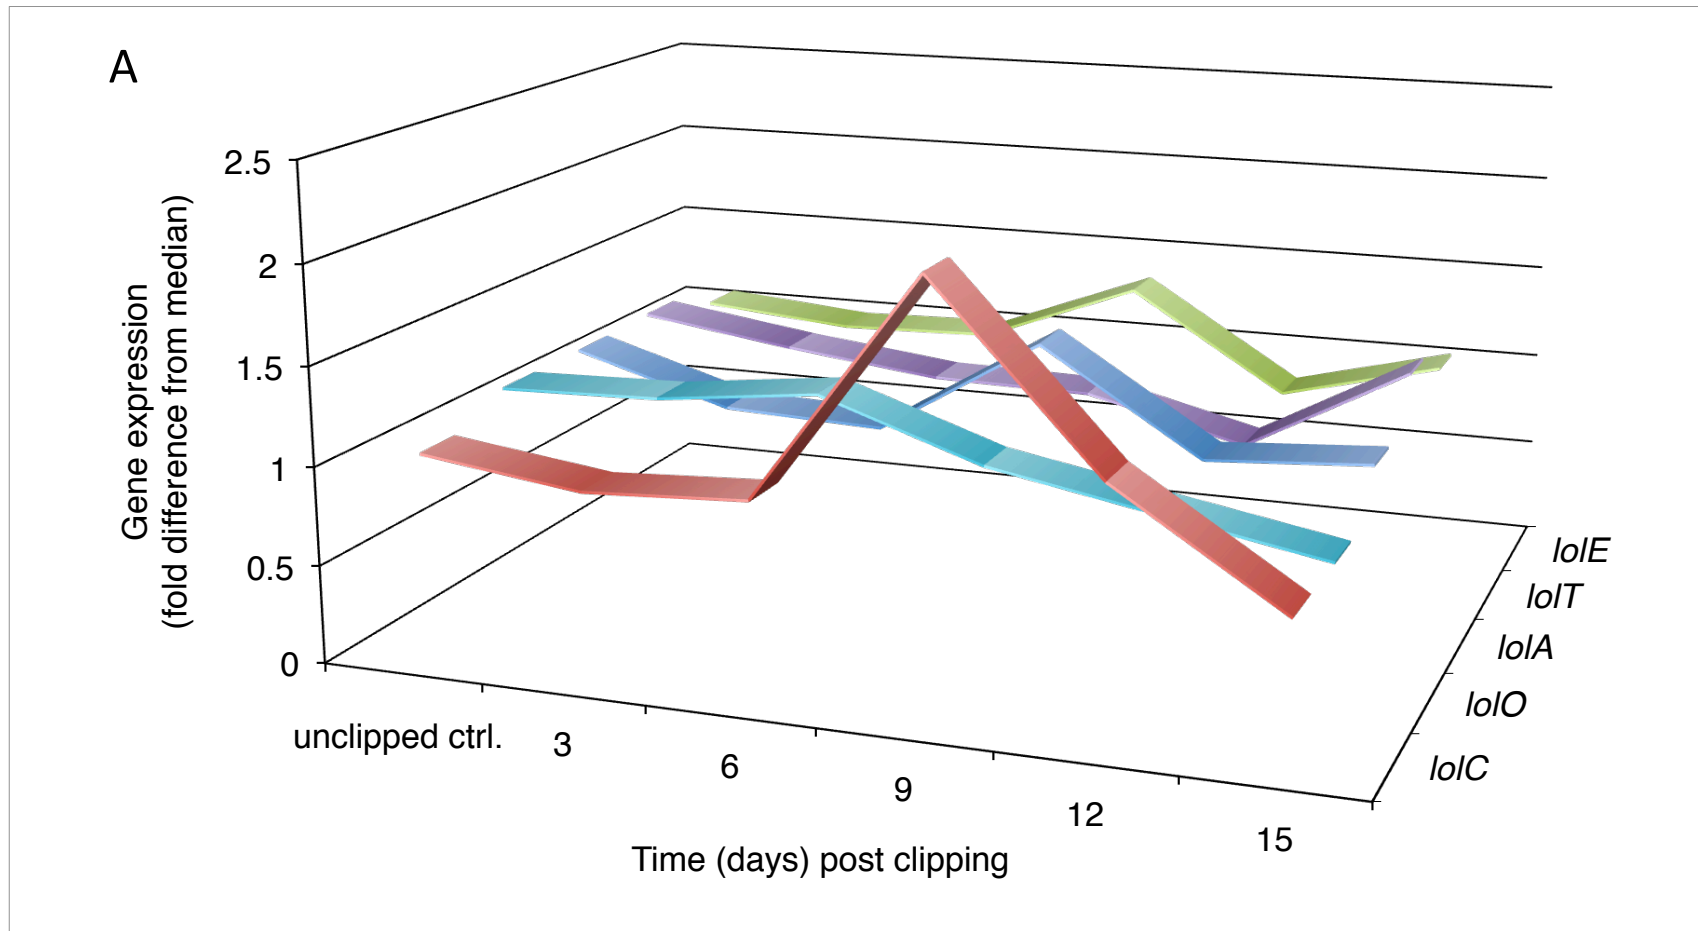

Supplemental Figure 1. Time course of *N. siegelii* gene expression in MF (**A**) basal and (**B** and **C**) regrowth tissues (n=2) after clipping, compared to unclipped controls (n=6). Gene expression is indicated as fold-difference from the median for each gene in the experiment, calculated from RT-qPCR as  $2^{-\Delta\Delta Ct}$ .

**B**

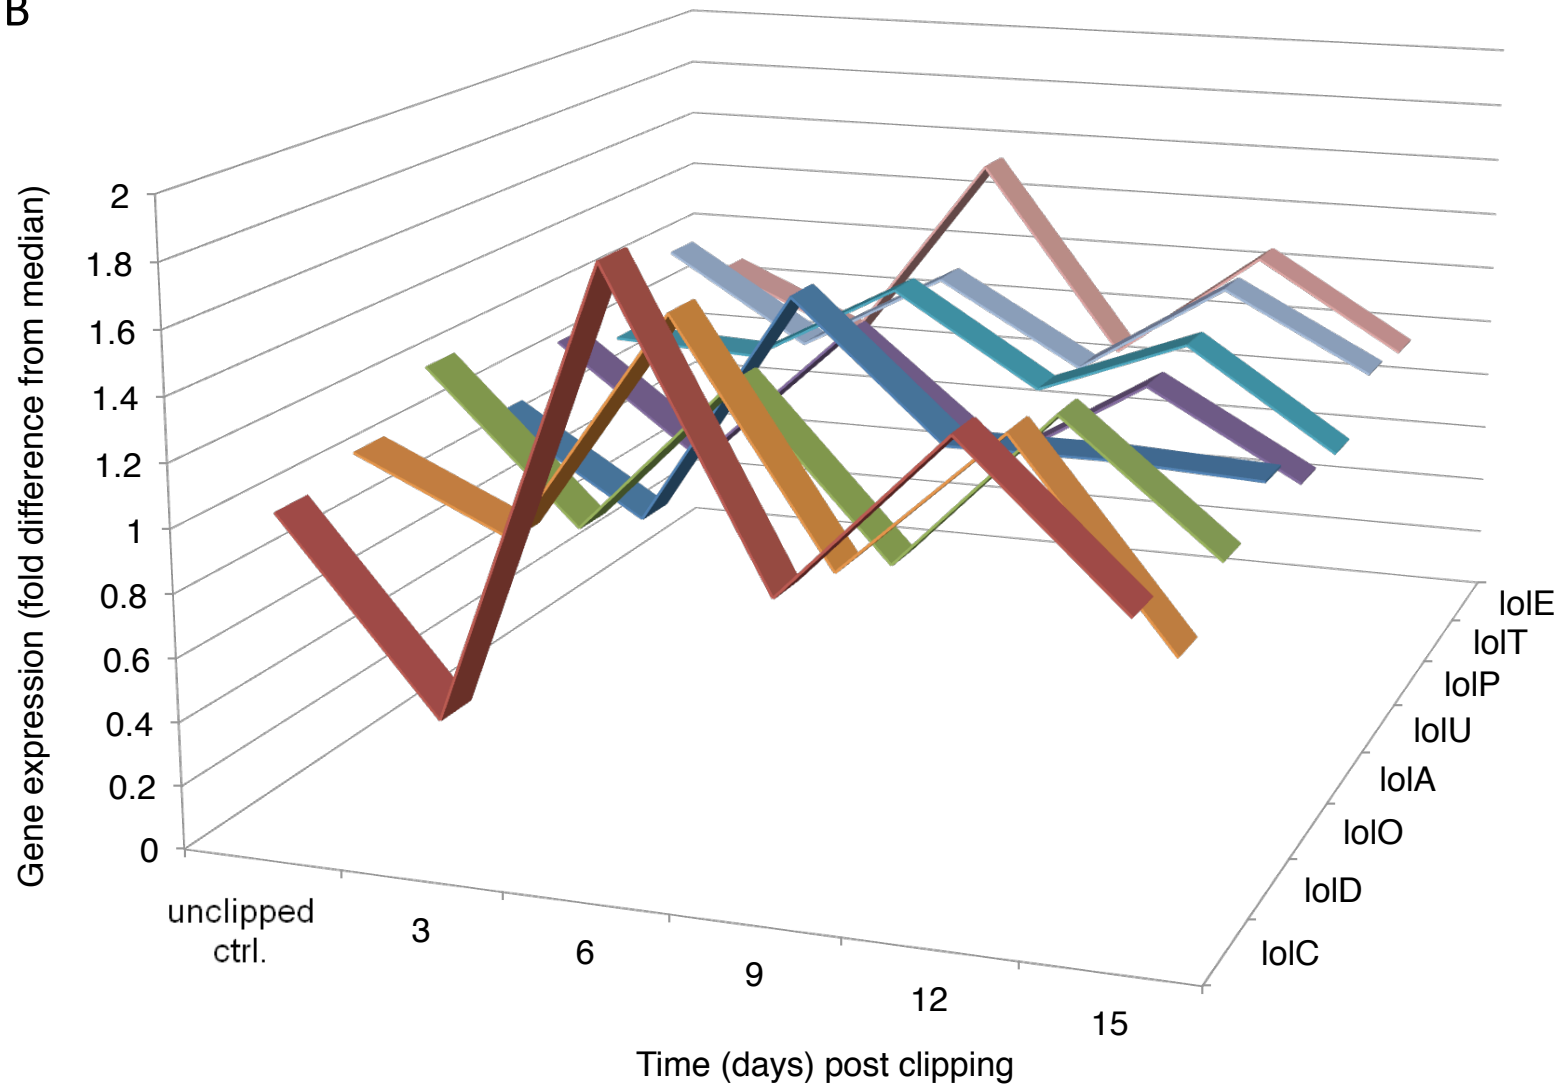

Supplemental Figure 1, panel **B**.

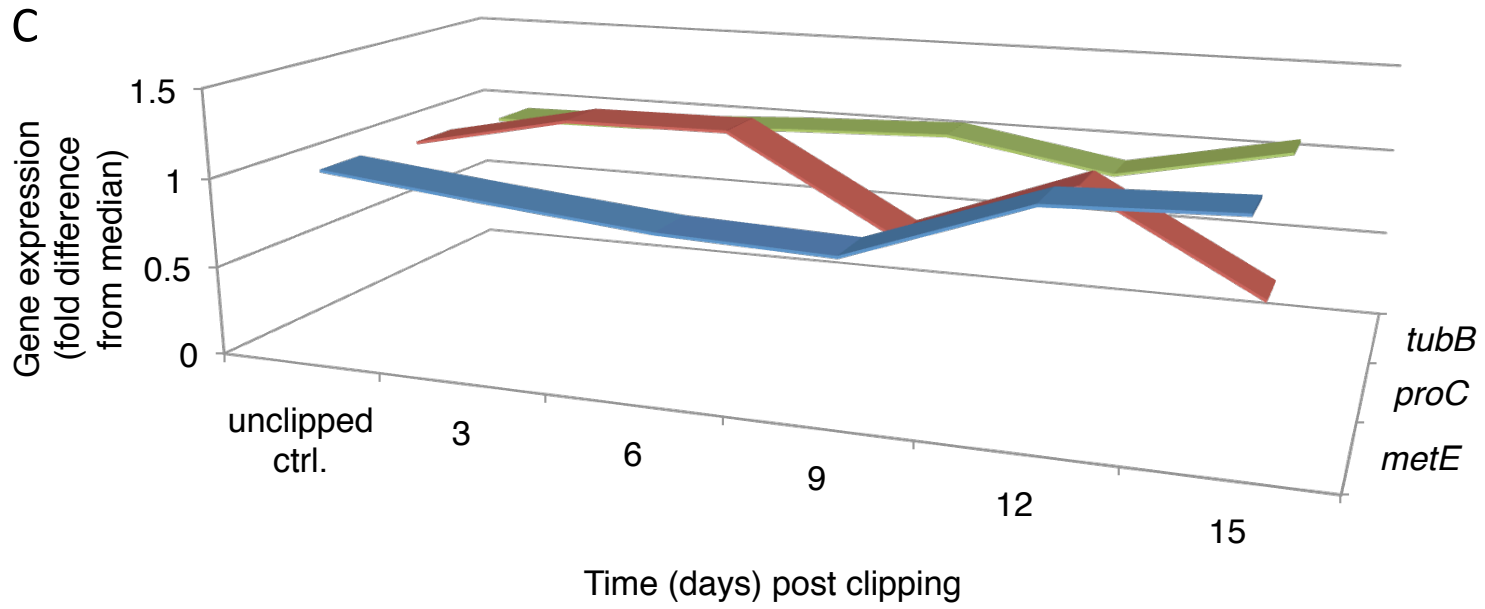

Supplemental Figure 1, panel **C**.

A

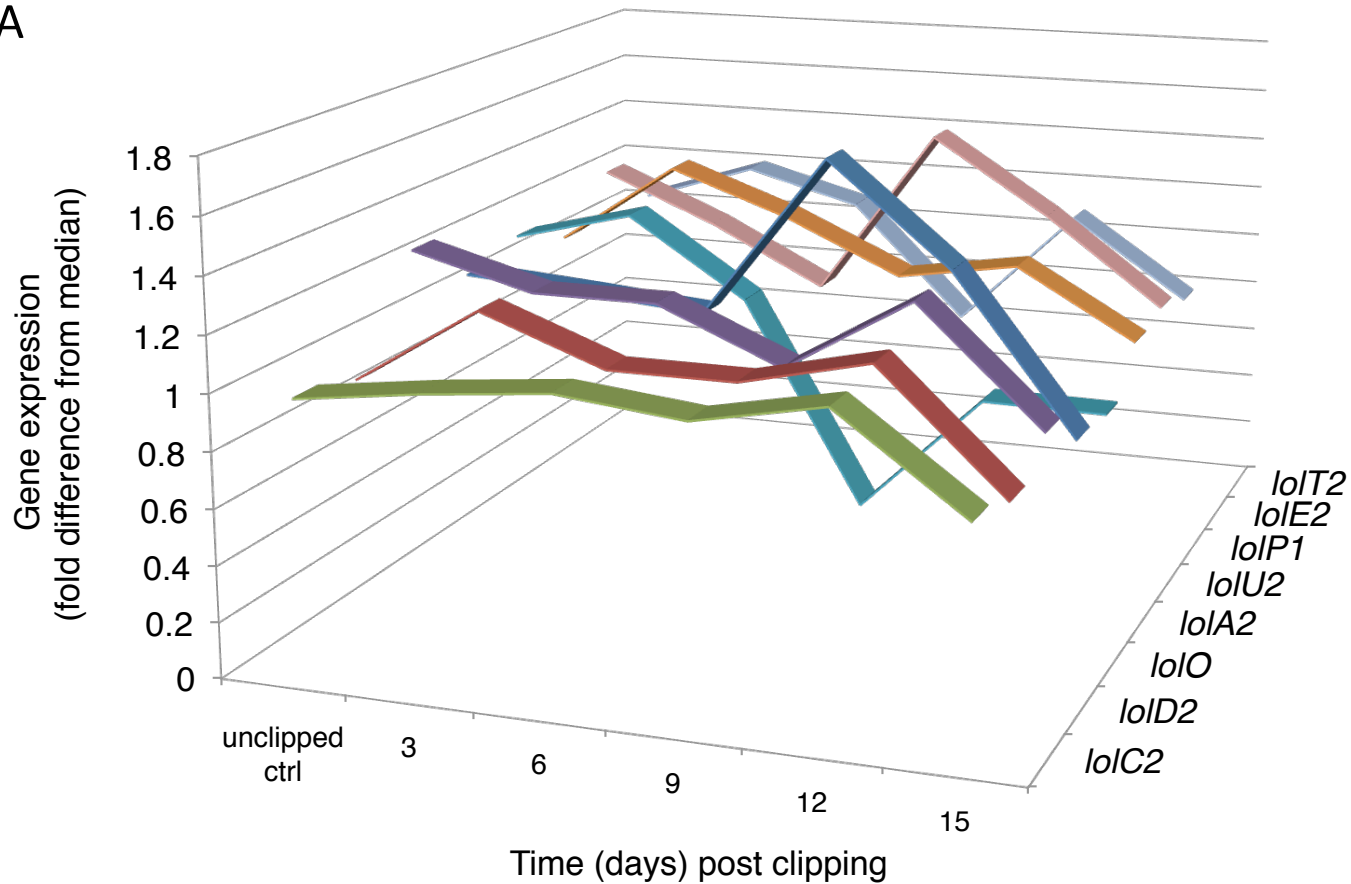

Supplemental Figure 2. Time course of *N. uncinatum* gene expression in MF regrowth tissues after clipping (n=2, except n = 1 at day 9 PC), compared to unclipped controls (n=4).

**A.** *LOL* gene expression;

**B**

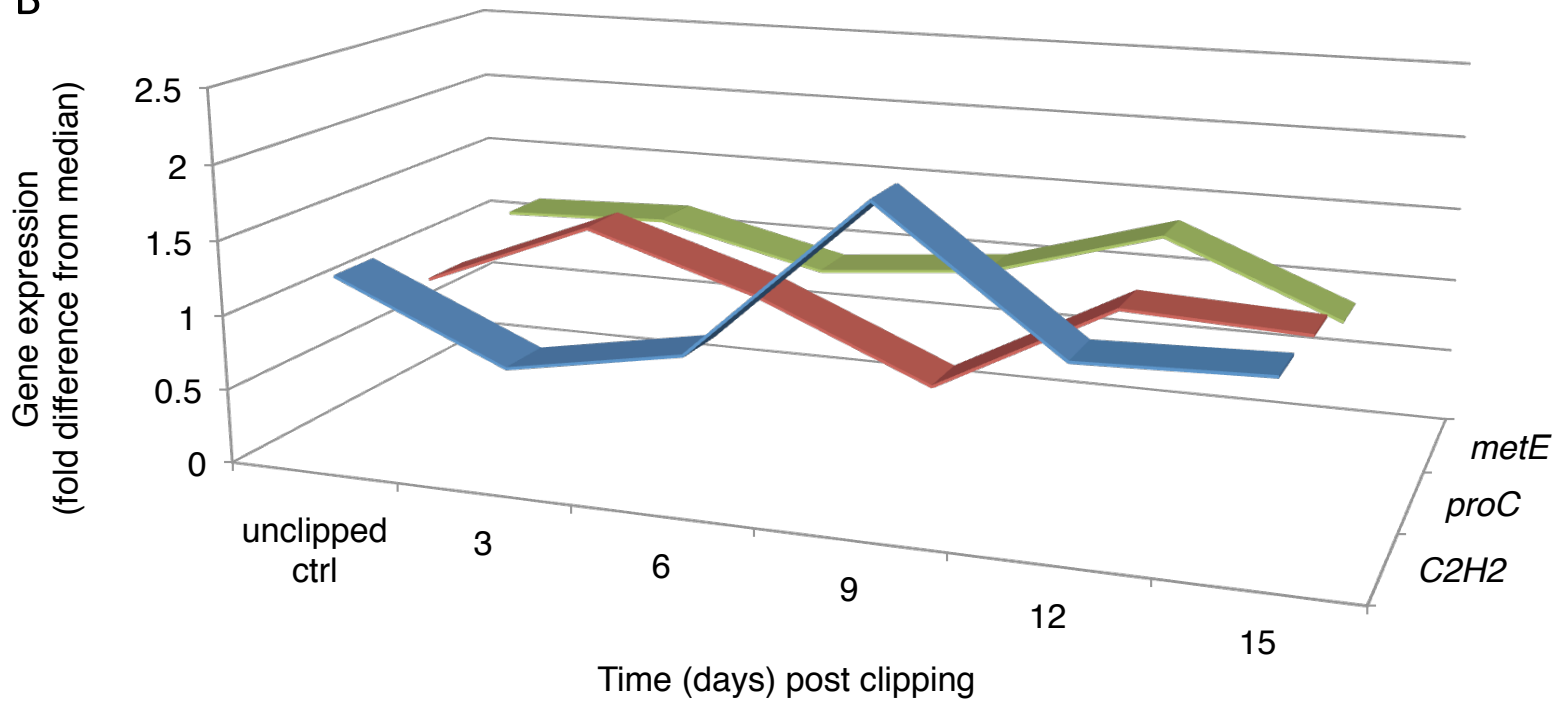

Supplemental Figure 2 (continued).

**B.** Expression of *proC*, *metE* and *C2H2* genes.
